# Supplementary material for: Genome Size Variation in Dianthus sylvestris Wulfen sensu lato (Caryophyllaceae)
Source: MDPI journal article supplement (doi:10.3390/plants11111481), 2022-05-31
Supplement: s1 [file s1]

**Table S1.** Relative genome size (RGS) and ploidy level (2x, DNA-diploids; 4x, DNA-tetraploids) of 162 populations of *Dianthus sylvestris* from the Balkan Peninsula and the Alps, including their provenance and voucher data. For each population, DNA ploidy estimates, mean RGS of a holoploid genome and standard deviation are given. Number of individuals analyzed for RGS in each population (N) and the range of CV values are also provided. Ploidy: 2x and 4x. Asterisk (\*) indicate the populations for which confirmatory chromosome counts were performed. Plus (+) for Morphometrics indicate the morphometrically analyzed populations in the previous study by Terlević et al. (submitted) [60].

| ID     | Population name     | Taxon                                         | Country         | Altitude (m a.s.l.) | Long (N) | Lat (E)  | Collector                                            | Collection date | Voucher            | Mean RGS | SD RGS | N | Range of CV | Ploidy | Morphometrics |
|--------|---------------------|-----------------------------------------------|-----------------|---------------------|----------|----------|------------------------------------------------------|-----------------|--------------------|----------|--------|---|-------------|--------|---------------|
| D131   | Pindus Theodoriana  | <i>D. sylvestris</i> subsp. <i>alboroseus</i> | Greece          | 1023                | 39.42647 | 21.21591 | S. Bogdanović, I. Ljubičić, I. Rešetnik, A. Terlević | 21/06/2019      | ZA-54934           | 0.352    | 0.003  | 5 | 1.99–2.82   | 2x     |               |
| D132   | Mt Gorilla          | <i>D. sylvestris</i> subsp. <i>alboroseus</i> | Greece          | 664                 | 39.49754 | 20.54052 | S. Bogdanović, I. Ljubičić, I. Rešetnik, A. Terlević | 21/06/2019      | ZA-54935           | 0.351    | 0.002  | 6 | 2.14–2.46   | 2x     | +             |
| D133   | Lygeres Siolades    | <i>D. sylvestris</i> subsp. <i>alboroseus</i> | Greece          | 744                 | 39.76638 | 21.09354 | S. Bogdanović, I. Ljubičić, I. Rešetnik, A. Terlević | 22/06/2019      | ZA-54936           | 0.353    | 0.003  | 5 | 2.15–4.74   | 2x     | +             |
| D134   | Lygeres Aoos        | <i>D. sylvestris</i> subsp. <i>alboroseus</i> | Greece          | 1398                | 39.82082 | 21.08762 | S. Bogdanović, I. Ljubičić, I. Rešetnik, A. Terlević | 22/06/2019      | ZA-54937           | 0.357    | 0.003  | 6 | 2.84–4.43   | 2x     |               |
| D135   | Kapesovo            | <i>D. sylvestris</i> subsp. <i>alboroseus</i> | Greece          | 1135                | 39.88615 | 20.78638 | S. Bogdanović, I. Ljubičić, I. Rešetnik, A. Terlević | 22/06/2019      | ZA-54938           | 0.356    | 0.002  | 5 | 2.84–4.09   | 2x     | +             |
| D137   | Pindus Pyrgos       | <i>D. sylvestris</i> subsp. <i>alboroseus</i> | Greece          | 631                 | 40.14424 | 20.82399 | S. Bogdanović, I. Ljubičić, I. Rešetnik, A. Terlević | 22/06/2019      | ZA-54940           | 0.348    | 0.006  | 4 | 2.93–3.84   | 2x     | +             |
| D138   | Pindus Mikropapingo | <i>D. sylvestris</i> subsp. <i>alboroseus</i> | Greece          | 1296                | 39.97295 | 20.74076 | S. Bogdanović, I. Ljubičić, I. Rešetnik, A. Terlević | 23/06/2019      | ZA-54941           | 0.350    | 0.003  | 6 | 2.02–2.57   | 2x     | +             |
| D139   | Pindus Drakolimni   | <i>D. sylvestris</i> subsp. <i>alboroseus</i> | Greece          | 2093                | 39.99494 | 20.78599 | S. Bogdanović, I. Ljubičić, I. Rešetnik, A. Terlević | 23/06/2019      | ZA-54942           | 0.349    | 0.005  | 5 | 2.77–4.72   | 2x     |               |
| D140   | Mt Dhembel          | <i>D. sylvestris</i> subsp. <i>alboroseus</i> | Albania         | 1523                | 40.21507 | 20.31646 | S. Bogdanović, I. Ljubičić, I. Rešetnik, A. Terlević | 24/06/2019      | ZA-54943           | 0.351    | 0.000  | 6 | 1.98–2.31   | 2x     | +             |
| D141   | Gjirokaster         | <i>D. sylvestris</i> subsp. <i>alboroseus</i> | Albania         | 400                 | 39.94504 | 20.25109 | S. Bogdanović, I. Ljubičić, I. Rešetnik, A. Terlević | 25/06/2019      | ZA-54944           | 0.353    | 0.002  | 6 | 2.54–2.59   | 2x     | +             |
| D142-1 | Llogara village     | <i>D. sylvestris</i> subsp. <i>alboroseus</i> | Albania         | 950                 | 40.21436 | 19.57959 | S. Bogdanović, I. Ljubičić, I. Rešetnik, A. Terlević | 25/06/2019      | ZA-54946           | 0.355    | 0.003  | 4 | 3.01–4.41   | 2x     |               |
| D142-2 | Llogara park        | <i>D. sylvestris</i> subsp. <i>alboroseus</i> | Albania         | 1600                | 40.20721 | 19.59952 | S. Bogdanović, I. Ljubičić, I. Rešetnik, A. Terlević | 25/06/2019      | ZA-54945           | 0.365    | 0.010  | 4 | 4.43–5.55   | 2x     |               |
| D78    | Mt Ostrovice        | <i>D. sylvestris</i> subsp. <i>alboroseus</i> | Albania         | 1386                | 40.5741  | 20.47551 | D. Lakušić, N. Kuzmanović, I. Janković, M. Zbiljić   | 11/07/2018      | ZA-48633           | 0.342    | 0.004  | 3 | 2.46–4.70   | 2x     |               |
| D150   | Rrapsh              | <i>D. sylvestris</i> subsp. <i>bertisceus</i> | Albania         | 773                 | 42.41509 | 19.50371 | S. Bogdanović, I. Ljubičić, I. Rešetnik, A. Terlević | 27/06/2019      | ZA-54956           | 0.336    | 0.005  | 6 | 2.19–2.80   | 2x     | +             |
| D151   | Thethi Shtegut      | <i>D. sylvestris</i> subsp. <i>bertisceus</i> | Albania         | 1735                | 42.38844 | 19.73021 | S. Bogdanović, I. Ljubičić, I. Rešetnik, A. Terlević | 28/06/2019      | ZA-54957           | 0.336    | 0.002  | 6 | 3.63–5.02   | 2x     | +             |
| D153   | Rruga Thethe        | <i>D. sylvestris</i> subsp. <i>bertisceus</i> | Albania         | 665                 | 42.32486 | 19.59345 | S. Bogdanović, I. Ljubičić, I. Rešetnik, A. Terlević | 28/06/2019      | ZA-54959           | 0.332    | 0.004  | 5 | 3.25–4.62   | 2x     | +             |
| D154   | Cijevna             | <i>D. sylvestris</i> subsp. <i>bertisceus</i> | Montenegro      | 139                 | 42.39835 | 19.36711 | S. Bogdanović, I. Ljubičić, I. Rešetnik, A. Terlević | 28/06/2019      | ZA-54960           | 0.326    | 0.001  | 5 | 4.70–5.09   | 2x     | +             |
| D158   | Slano jezero        | <i>D. sylvestris</i> subsp. <i>bertisceus</i> | Montenegro      | 900                 | 42.75111 | 18.79916 | S. Bogdanović, I. Ljubičić, I. Rešetnik, A. Terlević | 29/06/2019      | ZA-54964           | 0.334    | 0.001  | 5 | 3.55–3.60   | 2x     | +             |
| D169   | Mt Shkelzeni        | <i>D. sylvestris</i> subsp. <i>bertisceus</i> | Albania         | 2108                | 42.45568 | 20.11681 | D. Shuka                                             | 24/07/2019      | ZA-54975, ZA-54976 | 0.361    | 0.006  | 5 | 4.19–5.99   | 2x     | +             |
| D245   | Bistra              | <i>D. sylvestris</i> subsp. <i>bertisceus</i> | North Macedonia | 1700                | 41.60719 | 20.75689 | I. Rešetnik, M. Doboš, I. Ljubičić                   | 20/07/2021      | ZA-62635           | 0.344    | 0.007  | 4 | 4.20–5.84   | 2x     |               |

|      |                           |                                                   |                        |      |          |          |                                                                  |                         |          |       |       |    |           |    |   |
|------|---------------------------|---------------------------------------------------|------------------------|------|----------|----------|------------------------------------------------------------------|-------------------------|----------|-------|-------|----|-----------|----|---|
| D250 | Grahovo road              | <i>D. sylvestris</i><br>subsp. <i>bertisceus</i>  | Montenegro             | 800  | 42.47019 | 18.85884 | I. Rešetnik, M. Doboš, I. Ljubičić                               | 24/07/2021              | ZA-62639 | 0.347 | 0.008 | 4  | 4.52–5.63 | 2x |   |
| D86  | Sutjeska                  | <i>D. sylvestris</i><br>subsp. <i>bertisceus</i>  | Bosnia and Herzegovina | 638  | 43.31548 | 18.66821 | S. Bogdanović, I. Ljubičić                                       | 11/07/2018              | ZA-48662 | 0.330 | 0.003 | 4  | 2.55–5.47 | 2x | + |
| D87  | Mt Maglie                 | <i>D. sylvestris</i><br>subsp. <i>bertisceus</i>  | Bosnia and Herzegovina | 1580 | 43.27309 | 18.71955 | S. Bogdanović, I. Ljubičić                                       | 12/07/2018              | ZA-48663 | 0.334 | 0.001 | 3  | 4.66–4.96 | 2x | + |
| D88  | Piva river                | <i>D. sylvestris</i><br>subsp. <i>bertisceus</i>  | Montenegro             | 735  | 43.26326 | 18.84523 | S. Bogdanović, I. Ljubičić                                       | 12/07/2018              | ZA-48664 | 0.329 | 0.006 | 3  | 3.22–4.92 | 2x | + |
| D89  | Pivska planina            | <i>D. sylvestris</i><br>subsp. <i>bertisceus</i>  | Montenegro             | 1680 | 43.13713 | 18.94089 | S. Bogdanović, I. Ljubičić                                       | 13/07/2018              | ZA-48665 | 0.331 | 0.006 | 3  | 2.15–4.03 | 2x | + |
| D90  | Mt Durmitor               | <i>D. sylvestris</i><br>subsp. <i>bertisceus</i>  | Montenegro             | 2002 | 43.10045 | 19.05084 | S. Bogdanović, I. Ljubičić                                       | 13/07/2018              | ZA-48666 | 0.330 | 0.004 | 3  | 3.04–4.70 | 2x | + |
| D91  | Berane                    | <i>D. sylvestris</i><br>subsp. <i>bertisceus</i>  | Montenegro             | 711  | 42.88203 | 19.86147 | S. Bogdanović, I. Ljubičić                                       | 13/07/2018              | ZA-48612 | 0.328 | 0.002 | 3  | 3.03–4.01 | 2x | + |
| D92  | Andrijevice               | <i>D. sylvestris</i><br>subsp. <i>bertisceus</i>  | Montenegro             | 746  | 42.72892 | 19.82458 | S. Bogdanović, I. Ljubičić                                       | 13/07/2018              | ZA-48667 | 0.325 | 0.003 | 3  | 3.04–3.69 | 2x | + |
| D93  | Mt Prokletije Zeletin     | <i>D. sylvestris</i><br>subsp. <i>bertisceus</i>  | Montenegro             | 2011 | 42.64971 | 19.84412 | S. Bogdanović, I. Ljubičić                                       | 14/07/2018              | ZA-48668 | 0.330 | 0.007 | 3  | 2.71–3.78 | 2x | + |
| D94  | Mt Prokletije Popadija W  | <i>D. sylvestris</i><br>subsp. <i>bertisceus</i>  | Montenegro             | 1989 | 42.52064 | 19.76142 | S. Bogdanović, I. Ljubičić                                       | 14/07/2018              | ZA-48669 | 0.333 | 0.009 | 3  | 2.96–3.97 | 2x | + |
| D95  | Mt Prokletije Popadija SW | <i>D. sylvestris</i><br>subsp. <i>bertisceus</i>  | Montenegro             | 1948 | 42.67997 | 20.01136 | S. Bogdanović, I. Ljubičić                                       | 15/07/2018              | ZA-48670 | 0.331 | 0.002 | 5  | 2.73–4.94 | 2x | + |
| D96  | Moraca river              | <i>D. sylvestris</i><br>subsp. <i>bertisceus</i>  | Montenegro             | 278  | 42.69683 | 19.37431 | S. Bogdanović, I. Ljubičić                                       | 15/07/2018              | ZA-48613 | 0.332 | 0.007 | 3  | 4.01–4.60 | 2x | + |
| D178 | Mt Kozjak                 | <i>D. sylvestris</i><br>subsp. <i>kozjakensis</i> | North Macedonia        | 1292 | 41.40914 | 21.67842 | S. Bogdanović, I. Rešetnik                                       | 14/07/2019              | ZA-54985 | 0.336 | 0.003 | 5  | 1.82–2.36 | 2x | + |
| D106 | Sitnica                   | <i>D. sylvestris</i><br>subsp. <i>nodosus</i>     | Bosnia and Herzegovina | 915  | 42.56432 | 18.44312 | S. Bogdanović, I. Ljubičić                                       | 17/7/2018,<br>29/6/2019 | ZA-48623 | 0.328 | 0.002 | 5  | 1.79–5.00 | 2x | + |
| D124 | Lastovo                   | <i>D. sylvestris</i><br>subsp. <i>nodosus</i>     | Croatia                | 48   | 42.75519 | 16.92379 | I. Rešetnik, S. Bogdanović                                       | 04/06/2019              | ZA-54927 | 0.336 | 0.004 | 12 | 1.61–4.88 | 2x |   |
| D127 | Brac                      | <i>D. sylvestris</i><br>subsp. <i>nodosus</i>     | Croatia                | 150  | 43.26608 | 16.69359 | I. Ljubičić, A. Terlević, M. Grgurev                             | 04/06/2019              | ZA-54930 | 0.343 | 0.006 | 4  | 4.17–4.50 | 2x |   |
| D128 | Mosor                     | <i>D. sylvestris</i><br>subsp. <i>nodosus</i>     | Croatia                | 810  | 43.52237 | 16.61158 | S. Bogdanović, I. Ljubičić, I. Rešetnik, A. Terlević, M. Grgurev | 05/06/2019              | ZA-54931 | 0.337 | 0.004 | 5  | 2.73–4.41 | 2x |   |
| D160 | Peljesac                  | <i>D. sylvestris</i><br>subsp. <i>nodosus</i>     | Croatia                | 160  | 42.91527 | 17.42674 | S. Bogdanović, I. Ljubičić, I. Rešetnik, A. Terlević             | 29/06/2019              | ZA-54966 | 0.331 | 0.005 | 5  | 4.28–5.03 | 2x | + |
| D183 | Smrcnjak                  | <i>D. sylvestris</i><br>subsp. <i>nodosus</i>     | Croatia                | 83   | 43.75222 | 15.87861 | L. Laca, S. Bogdanović                                           | 17/06/2020              | ZA-56692 | 0.324 | 0.004 | 5  | 2.43–4.04 | 2x | + |
| D192 | Vrsak                     | <i>D. sylvestris</i><br>subsp. <i>nodosus</i>     | Croatia                | 1713 | 43.71589 | 16.8893  | M. Doboš                                                         | 22/07/2020              | ZA-56821 | 0.331 | 0.002 | 5  | 2.61–4.10 | 2x | + |
| D193 | Gornja Korita             | <i>D. sylvestris</i><br>subsp. <i>nodosus</i>     | Croatia                | 906  | 43.70998 | 16.8192  | S. Bogdanović                                                    | 22/07/2020              | ZA-56822 | 0.337 | 0.009 | 5  | 3.93–5.57 | 2x |   |
| D2   | Korcula                   | <i>D. sylvestris</i><br>subsp. <i>nodosus</i>     | Croatia                | 250  | 42.94086 | 17.08055 | I. Rešetnik, S. Bogdanović                                       | 11/05/2018              | ZA-46277 | 0.337 | 0.004 | 4  | 2.89–4.75 | 2x |   |
| D254 | Hrgud                     | <i>D. sylvestris</i><br>subsp. <i>nodosus</i>     | Bosnia and Herzegovina | 1069 | 43.09763 | 18.05759 | I. Rešetnik, M. Doboš, I. Ljubičić                               | 25/07/2021              | ZA-62640 | 0.334 | 0.003 | 3  | 3.98–6.29 | 2x |   |
| D27  | Mt Velebit Pleševica      | <i>D. sylvestris</i><br>subsp. <i>nodosus</i>     | Croatia                | 1211 | 44.70794 | 14.96583 | I. Rešetnik, S. Bogdanović, I. Ljubičić                          | 15/06/2018              | ZA-47427 | 0.335 | 0.007 | 3  | 2.88–4.93 | 2x |   |
| D275 | Hvar                      | <i>D. sylvestris</i><br>subsp. <i>nodosus</i>     | Croatia                | 610  | 43.14478 | 16.5971  | S. Bogdanović                                                    | 28/07/2021              | ZA-62642 | 0.348 | 0.003 | 5  | 3.20–5.61 | 2x |   |
| D28  | Mt Velebit Alan           | <i>D. sylvestris</i><br>subsp. <i>nodosus</i>     | Croatia                | 1020 | 44.7153  | 14.9569  | I. Rešetnik, S. Bogdanović, I. Ljubičić                          | 15/06/2018              | ZA-47428 | 0.334 | 0.002 | 10 | 2.70–4.73 | 2x | + |

|       |                              |                                                  |                           |      |          |          |                                            |                         |          |       |       |   |           |     |   |
|-------|------------------------------|--------------------------------------------------|---------------------------|------|----------|----------|--------------------------------------------|-------------------------|----------|-------|-------|---|-----------|-----|---|
| D33   | Mt Velebit<br>Baske Ostarije | <i>D. sylvestris</i><br>subsp. <i>nodosus</i>    | Croatia                   | 905  | 44.52948 | 15.14316 | I. Rešetnik, S. Bogdanović,<br>I. Ljubičić | 15/06/2018              | ZA-47433 | 0.332 | 0.005 | 3 | 2.79–4.93 | 2x  | + |
| D42   | Mt Velebit<br>Brundo         | <i>D. sylvestris</i><br>subsp. <i>nodosus</i>    | Croatia                   | 1605 | 44.36112 | 15.51313 | I. Rešetnik, S. Bogdanović,<br>I. Ljubičić | 17/06/2018              | ZA-47442 | 0.344 | 0.004 | 5 | 3.00–6.03 | 2x  |   |
| D46   | Sibenik                      | <i>D. sylvestris</i><br>subsp. <i>nodosus</i>    | Croatia                   | 18   | 43.73736 | 15.87176 | I. Rešetnik, S. Bogdanović,<br>I. Ljubičić | 18/06/2018              | ZA-47456 | 0.338 | 0.008 | 6 | 2.80–5.16 | 2x  | + |
| D47-1 | Mt Biokovo low               | <i>D. sylvestris</i><br>subsp. <i>nodosus</i>    | Croatia                   | 325  | 43.25955 | 17.07843 | I. Rešetnik, S. Bogdanović,<br>I. Ljubičić | 18/06/2018              | ZA-47457 | 0.342 | 0.005 | 6 | 4.22–4.91 | 2x  | + |
| D47-2 | Mt Biokovo high              | <i>D. sylvestris</i><br>subsp. <i>nodosus</i>    | Croatia                   | 1116 | 43.28407 | 17.08662 | I. Rešetnik, S. Bogdanović,<br>I. Ljubičić | 18/06/2018              | ZA-47459 | 0.344 | 0.009 | 7 | 2.75–5.73 | 2x  | + |
| D52   | Mostar                       | <i>D. sylvestris</i><br>subsp. <i>nodosus</i>    | Bosnia and<br>Herzegovina | 382  | 43.32759 | 17.80412 | I. Rešetnik, S. Bogdanović,<br>I. Ljubičić | 19/06/2018              | ZA-47463 | 0.331 | 0.009 | 4 | 2.87–4.60 | 2x  | + |
| D55   | Konjic                       | <i>D. sylvestris</i><br>subsp. <i>nodosus</i>    | Bosnia and<br>Herzegovina | 360  | 43.64998 | 17.96701 | I. Rešetnik, S. Bogdanović,<br>I. Ljubičić | 19/06/2018              | ZA-47466 | 0.332 | 0.001 | 6 | 2.24–4.75 | 2x  | + |
| D56   | Vranic                       | <i>D. sylvestris</i><br>subsp. <i>nodosus</i>    | Bosnia and<br>Herzegovina | 549  | 43.41747 | 17.41643 | I. Rešetnik, S. Bogdanović,<br>I. Ljubičić | 20/06/2018              | ZA-47467 | 0.327 | 0.004 | 4 | 4.00–4.65 | 2x  | + |
| D57   | Blidinje                     | <i>D. sylvestris</i><br>subsp. <i>nodosus</i>    | Bosnia and<br>Herzegovina | 1298 | 43.58668 | 17.48789 | I. Rešetnik, S. Bogdanović,<br>I. Ljubičić | 20/06/2018              | ZA-47468 | 0.334 | 0.004 | 5 | 2.49–5.07 | 2x  | + |
| D6    | Mironja                      | <i>D. sylvestris</i><br>subsp. <i>nodosus</i>    | Croatia                   | 332  | 42.81569 | 17.84349 | I. Rešetnik, S. Bogdanović                 | 13/5/2018,<br>29/6/2019 | ZA-46281 | 0.325 | 0.003 | 9 | 2.60–4.85 | 2x  | + |
| D60   | Mt Cvrstica<br>Cavkarice     | <i>D. sylvestris</i><br>subsp. <i>nodosus</i>    | Bosnia and<br>Herzegovina | 1556 | 43.57896 | 17.54072 | I. Rešetnik, S. Bogdanović,<br>I. Ljubičić | 20/06/2018              | ZA-47471 | 0.346 | 0.008 | 4 | 2.72–4.92 | 2x  | + |
| D61   | Trobukva                     | <i>D. sylvestris</i><br>subsp. <i>nodosus</i>    | Bosnia and<br>Herzegovina | 904  | 43.54695 | 17.27952 | I. Rešetnik, S. Bogdanović,<br>I. Ljubičić | 20/06/2018              | ZA-47472 | 0.331 | 0.001 | 4 | 1.36–3.96 | 2x  | + |
| D63   | Mt Cincar Krug               | <i>D. sylvestris</i><br>subsp. <i>nodosus</i>    | Bosnia and<br>Herzegovina | 1197 | 43.85963 | 17.03066 | I. Rešetnik, S. Bogdanović,<br>I. Ljubičić | 21/06/2018              | ZA-47474 | 0.334 | 0.006 | 5 | 1.84–2.76 | 2x  | + |
| D64   | Mt Cincar<br>Begovaca        | <i>D. sylvestris</i><br>subsp. <i>nodosus</i>    | Bosnia and<br>Herzegovina | 1397 | 43.88544 | 17.05981 | I. Rešetnik, S. Bogdanović,<br>I. Ljubičić | 21/06/2018              | ZA-47475 | 0.336 | 0.006 | 4 | 3.95–4.70 | 2x  | + |
| D65   | Livno Jurina<br>glava        | <i>D. sylvestris</i><br>subsp. <i>nodosus</i>    | Bosnia and<br>Herzegovina | 1096 | 43.78286 | 17.16035 | I. Rešetnik, S. Bogdanović,<br>I. Ljubičić | 21/06/2018              | ZA-47476 | 0.334 | 0.005 | 5 | 2.13–4.49 | 2x  | + |
| D66   | Drvar                        | <i>D. sylvestris</i><br>subsp. <i>nodosus</i>    | Bosnia and<br>Herzegovina | 716  | 44.34866 | 16.35956 | I. Rešetnik, S. Bogdanović,<br>I. Ljubičić | 22/06/2018              | ZA-47477 | 0.340 | 0.002 | 3 | 4.52–4.99 | 2x  | + |
| D8    | Omis                         | <i>D. sylvestris</i><br>subsp. <i>nodosus</i>    | Croatia                   | 63   | 43.45025 | 16.69853 | I. Rešetnik, S. Bogdanović                 | 13/5/2018,<br>29/6/2019 | ZA-46283 | 0.328 | 0.004 | 6 | 2.44–3.13 | 2x  | + |
| D80   | Mt Dinara<br>Glavas          | <i>D. sylvestris</i><br>subsp. <i>nodosus</i>    | Croatia                   | 740  | 44.01427 | 16.41704 | S. Bogdanović, I. Ljubičić                 | 30/06/2018              | ZA-48607 | 0.340 | 0.008 | 6 | 4.28–6.00 | 2x  | + |
| D82   | Mt Svilaja                   | <i>D. sylvestris</i><br>subsp. <i>nodosus</i>    | Croatia                   | 934  | 43.75119 | 16.52322 | S. Bogdanović, I. Ljubičić                 | 01/07/2018              | ZA-48608 | 0.336 | 0.003 | 5 | 3.53–4.66 | 2x  | + |
| D85   | Mt Vlasic                    | <i>D. sylvestris</i><br>subsp. <i>nodosus</i>    | Bosnia and<br>Herzegovina | 1100 | 44.25852 | 17.62419 | S. Bogdanović, I. Ljubičić                 | 10/07/2018              | ZA-48611 | 0.329 | 0.005 | 3 | 3.72–4.65 | 2x  | + |
| D12   | Nacinovici                   | <i>D. sylvestris</i><br>subsp. <i>sylvestris</i> | Croatia                   | 240  | 45.12395 | 14.20468 | S. Bogdanović, I. Ljubičić                 | 19/5/2018,<br>13/7/2019 | ZA-46416 | 0.641 | 0.007 | 8 | 2.43–4.66 | 4x* | + |
| D130  | Krcic                        | <i>D. sylvestris</i><br>subsp. <i>sylvestris</i> | Croatia                   | 345  | 44.03398 | 16.29247 | S. Bogdanović, I. Ljubičić                 | 14/06/2019              | ZA-54933 | 0.327 | 0.002 | 5 | 2.48–3.89 | 2x  | + |
| D162  | Ostrec                       | <i>D. sylvestris</i><br>subsp. <i>sylvestris</i> | Croatia                   | 740  | 45.76377 | 15.6486  | A. Terlević, M. Grgurev                    | 05/07/2019              | ZA-54968 | 0.325 | 0.001 | 5 | 1.85–1.91 | 2x  | + |
| D165  | Litija                       | <i>D. sylvestris</i><br>subsp. <i>sylvestris</i> | Slovenia                  | 295  | 46.08895 | 14.8873  | A. Terlević, I. Ljubičić                   | 09/07/2019              | ZA-54971 | 0.331 | 0.003 | 5 | 3.31–4.29 | 2x  |   |
| D166  | Polhograjska<br>Grmada       | <i>D. sylvestris</i><br>subsp. <i>sylvestris</i> | Slovenia                  | 900  | 46.08407 | 14.33474 | A. Terlević, I. Ljubičić                   | 10/07/2019              | ZA-54972 | 0.333 | 0.006 | 4 | 2.18–3.34 | 2x  | + |
| D17   | Mt Spacatto                  | <i>D. sylvestris</i><br>subsp. <i>sylvestris</i> | Italy                     | 300  | 45.64227 | 13.8311  | I. Rešetnik, S. Bogdanović,<br>I. Ljubičić | 13/06/2018              | ZA-47417 | 0.640 | 0.004 | 3 | 2.00–2.54 | 4x  | + |
| D184  | Lim bay                      | <i>D. sylvestris</i><br>subsp. <i>sylvestris</i> | Croatia                   | 136  | 45.13314 | 13.73433 | A. Terlević                                | 21/06/2020              | ZA-56693 | 0.328 | 0.007 | 5 | 2.96–6.55 | 2x  | + |

|       |                            |                                                   |                           |      |          |          |                                                                        |                         |          |       |       |   |           |     |   |
|-------|----------------------------|---------------------------------------------------|---------------------------|------|----------|----------|------------------------------------------------------------------------|-------------------------|----------|-------|-------|---|-----------|-----|---|
| D19-2 | Vodice tetrapl             | <i>D. sylvestris</i><br>subsp. <i>sylvestris</i>  | Croatia                   | 660  | 45.47917 | 14.04971 | I. Rešetnik, S. Bogdanović,<br>I. Ljubičić                             | 13/6/2018,<br>13/7/2019 | ZA-47419 | 0.651 | 0.006 | 8 | 1.80–3.57 | 4x  | + |
| D196  | Brkini                     | <i>D. sylvestris</i><br>subsp. <i>sylvestris</i>  | Slovenia                  | 625  | 45.50694 | 14.16806 | B. Frajman                                                             | 15/08/2020              | ZA-56825 | 0.657 | 0.006 | 5 | 1.85–2.80 | 4x  |   |
| D20   | Zbevnica                   | <i>D. sylvestris</i><br>subsp. <i>sylvestris</i>  | Croatia                   | 941  | 45.45721 | 14.01632 | I. Rešetnik, S. Bogdanović,<br>I. Ljubičić                             | 13/6/2018,<br>19/7/2020 | ZA-47420 | 0.651 | 0.004 | 3 | 3.55–4.50 | 4x* | + |
| D205  | Klecice                    | <i>D. sylvestris</i><br>subsp. <i>sylvestris</i>  | Croatia                   | 968  | 45.26685 | 15.1413  | I. Ljubičić, A. Terlević                                               | 16/06/2021              | ZA-62605 | 0.337 | 0.007 | 4 | 4.36–5.37 | 2x  |   |
| D206  | Mt Calvo                   | <i>D. sylvestris</i><br>subsp. <i>sylvestris</i>  | Italy                     | 360  | 45.65316 | 13.82246 | I. Rešetnik, S. Bogdanović,<br>M. Temunović, A. Terlević               | 28/06/2021              | ZA-62606 | 0.646 | 0.008 | 4 | 2.57–3.58 | 4x  |   |
| D207  | Hervati                    | <i>D. sylvestris</i><br>subsp. <i>sylvestris</i>  | Italy                     | 345  | 45.6259  | 13.86941 | I. Rešetnik, S. Bogdanović,<br>M. Temunović, A. Terlević               | 28/06/2021              | ZA-62607 | 0.652 | 0.009 | 6 | 2.70–4.30 | 4x  |   |
| D21   | Slum                       | <i>D. sylvestris</i><br>subsp. <i>sylvestris</i>  | Croatia                   | 553  | 45.4234  | 14.01213 | I. Rešetnik, S. Bogdanović,<br>I. Ljubičić                             | 13/6/2018,<br>19/7/2020 | ZA-47421 | 0.650 | 0.009 | 4 | 2.26–5.01 | 4x* | + |
| D22   | Mt Ucka                    | <i>D. sylvestris</i><br>subsp. <i>sylvestris</i>  | Croatia                   | 525  | 45.31681 | 14.17734 | I. Rešetnik, S. Bogdanović,<br>I. Ljubičić                             | 13/06/2018              | ZA-47422 | 0.656 | 0.010 | 4 | 2.02–4.90 | 4x  | + |
| D24   | Gornje Jelenje             | <i>D. sylvestris</i><br>subsp. <i>sylvestris</i>  | Croatia                   | 862  | 45.36157 | 14.61724 | I. Rešetnik, S. Bogdanović,<br>I. Ljubičić                             | 14/06/2018              | ZA-47424 | 0.648 | 0.003 | 5 | 2.35–4.87 | 4x  | + |
| D256  | Velez                      | <i>D. sylvestris</i><br>subsp. <i>sylvestris</i>  | Bosnia and<br>Herzegovina | 1912 | 43.35755 | 17.93495 | I. Rešetnik, M. Doboš, I.<br>Ljubičić                                  | 25/07/2021              | ZA-62641 | 0.340 | 0.009 | 4 | 4.23–5.21 | 2x  |   |
| D34   | Mt Velebit<br>Visocica     | <i>D. sylvestris</i><br>subsp. <i>sylvestris</i>  | Croatia                   | 1458 | 44.4293  | 15.3643  | I. Rešetnik, S. Bogdanović,<br>I. Ljubičić                             | 16/06/2018              | ZA-47434 | 0.334 | 0.004 | 4 | 3.14–4.43 | 2x  |   |
| D37   | Mt Velebit<br>Buljma       | <i>D. sylvestris</i><br>subsp. <i>sylvestris</i>  | Croatia                   | 1218 | 44.36597 | 15.46143 | I. Rešetnik, S. Bogdanović,<br>I. Ljubičić                             | 17/06/2018              | ZA-47437 | 0.336 | 0.004 | 5 | 3.77–4.93 | 2x  | + |
| D38   | Mt Paklenica<br>Struge     | <i>D. sylvestris</i><br>subsp. <i>sylvestris</i>  | Croatia                   | 1368 | 44.37109 | 15.46567 | I. Rešetnik, S. Bogdanović,<br>I. Ljubičić                             | 17/06/2018              | ZA-47438 | 0.339 | 0.006 | 3 | 2.74–4.53 | 2x  | + |
| D58   | Mt Cvrstica SW             | <i>D. sylvestris</i><br>subsp. <i>sylvestris</i>  | Bosnia and<br>Herzegovina | 1928 | 43.59503 | 17.54076 | I. Rešetnik, S. Bogdanović,<br>I. Ljubičić                             | 20/06/2018              | ZA-47469 | 0.325 | 0.001 | 3 | 2.97–4.59 | 2x  |   |
| D59   | Mt Cvrstica<br>Siroka kosa | <i>D. sylvestris</i><br>subsp. <i>sylvestris</i>  | Bosnia and<br>Herzegovina | 1732 | 43.58652 | 17.53378 | I. Rešetnik, S. Bogdanović,<br>I. Ljubičić                             | 20/06/2018              | ZA-47470 | 0.334 | 0.007 | 4 | 3.72–5.07 | 2x  | + |
| D81   | Mt Dinara<br>Osljak        | <i>D. sylvestris</i><br>subsp. <i>sylvestris</i>  | Croatia                   | 1418 | 44.03867 | 16.39343 | S. Bogdanović, I. Ljubičić                                             | 30/06/2018              | ZA-48606 | 0.336 | 0.008 | 3 | 4.39–4.93 | 2x  | + |
| D83   | Banja Luka                 | <i>D. sylvestris</i><br>subsp. <i>sylvestris</i>  | Bosnia and<br>Herzegovina | 207  | 44.68547 | 17.1797  | S. Bogdanović, I. Ljubičić                                             | 10/07/2018              | ZA-48609 | 0.329 | 0.005 | 3 | 2.99–4.99 | 2x  | + |
| D84   | Jajce                      | <i>D. sylvestris</i><br>subsp. <i>sylvestris</i>  | Bosnia and<br>Herzegovina | 380  | 44.3468  | 17.24253 | S. Bogdanović, I. Ljubičić                                             | 10/07/2018              | ZA-48610 | 0.338 | 0.009 | 3 | 2.12–4.87 | 2x  |   |
| D1    | Klek village               | <i>D. sylvestris</i><br>subsp. <i>tergestinus</i> | Croatia                   | 80   | 42.94874 | 17.56451 | I. Rešetnik, S. Bogdanović                                             | 09/05/2018              | ZA-46276 | 0.345 | 0.005 | 3 | 4.58–5.00 | 2x  | + |
| D11   | Gornji<br>Kamenjak         | <i>D. sylvestris</i><br>subsp. <i>tergestinus</i> | Croatia                   | 55   | 44.81097 | 13.90088 | S. Bogdanović, I. Ljubičić                                             | 17/05/2018              | ZA-46415 | 0.339 | 0.005 | 4 | 2.96–4.68 | 2x  | + |
| D111  | Cres                       | <i>D. sylvestris</i><br>subsp. <i>tergestinus</i> | Croatia                   | 40   | 44.97721 | 14.445   | S. Bogdanović, S. Cambria                                              | 21/10/2018              | ZA-48628 | 0.342 | 0.002 | 4 | 2.05–4.25 | 2x  |   |
| D129  | Gradina                    | <i>D. sylvestris</i><br>subsp. <i>tergestinus</i> | Croatia                   | 186  | 43.77399 | 15.95608 | S. Bogdanović, I. Ljubičić,<br>I. Rešetnik, A. Terlević, M.<br>Grgurev | 05/06/2019              | ZA-54932 | 0.340 | 0.004 | 4 | 2.98–4.02 | 2x  | + |
| D13   | Krizisce                   | <i>D. sylvestris</i><br>subsp. <i>tergestinus</i> | Croatia                   | 513  | 45.2676  | 14.59441 | S. Bogdanović, I. Ljubičić                                             | 19/05/2018              | ZA-46417 | 0.333 | 0.004 | 4 | 3.75–4.68 | 2x  | + |
| D16   | Sezana                     | <i>D. sylvestris</i><br>subsp. <i>tergestinus</i> | Italy                     | 344  | 45.70153 | 13.83729 | I. Rešetnik, S. Bogdanović,<br>I. Ljubičić                             | 13/06/2018              | ZA-47416 | 0.341 | 0.007 | 4 | 3.31–3.82 | 2x  | + |
| D18   | Petrinje                   | <i>D. sylvestris</i><br>subsp. <i>tergestinus</i> | Slovenia                  | 422  | 45.57284 | 13.90681 | I. Rešetnik, S. Bogdanović,<br>I. Ljubičić                             | 13/06/2018              | ZA-47418 | 0.336 | 0.008 | 5 | 2.66–4.99 | 2x  | + |
| D185  | Krk                        | <i>D. sylvestris</i><br>subsp. <i>tergestinus</i> | Croatia                   | 220  | 45.02389 | 14.64694 | I. Rešetnik                                                            | 14/06/2020              | ZA-56694 | 0.340 | 0.004 | 5 | 3.30–6.93 | 2x* |   |

|       |                             |                                                   |                           |      |          |          |                                            |            |          |       |       |   |            |     |   |
|-------|-----------------------------|---------------------------------------------------|---------------------------|------|----------|----------|--------------------------------------------|------------|----------|-------|-------|---|------------|-----|---|
| D25   | Bunica                      | <i>D. sylvestris</i><br>subsp. <i>tergestinus</i> | Croatia                   | 8    | 45.02484 | 14.88473 | I. Rešetnik, S. Bogdanović,<br>I. Ljubičić | 14/06/2018 | ZA-47425 | 0.337 | 0.001 | 4 | 2.67–4.62  | 2x  |   |
| D29   | Donji Bileni                | <i>D. sylvestris</i><br>subsp. <i>tergestinus</i> | Croatia                   | 274  | 44.71196 | 14.9225  | I. Rešetnik, S. Bogdanović,<br>I. Ljubičić | 15/06/2018 | ZA-47429 | 0.340 | 0.007 | 5 | 2.46–4.92  | 2x  |   |
| D32   | Karlobag                    | <i>D. sylvestris</i><br>subsp. <i>tergestinus</i> | Croatia                   | 12   | 44.53338 | 15.06519 | I. Rešetnik, S. Bogdanović,<br>I. Ljubičić | 15/06/2018 | ZA-47432 | 0.335 | 0.005 | 3 | 4.09–4.66  | 2x* |   |
| D36   | Mt Velebit<br>Paklenica     | <i>D. sylvestris</i><br>subsp. <i>tergestinus</i> | Croatia                   | 397  | 44.31347 | 15.45328 | I. Rešetnik, S. Bogdanović,<br>I. Ljubičić | 17/06/2018 | ZA-47436 | 0.340 | 0.006 | 4 | 2.86–4.77  | 2x  | + |
| D4    | Dubrovnik                   | <i>D. sylvestris</i><br>subsp. <i>tergestinus</i> | Croatia                   | 279  | 42.64521 | 18.12021 | I. Rešetnik, S. Bogdanović                 | 12/05/2018 | ZA-46279 | 0.352 | 0.005 | 3 | 2.75–4.26  | 2x  | + |
| D43   | Vransko jezero              | <i>D. sylvestris</i><br>subsp. <i>tergestinus</i> | Croatia                   | 35   | 43.86523 | 15.6423  | I. Rešetnik, S. Bogdanović,<br>I. Ljubičić | 18/06/2018 | ZA-47453 | 0.341 | 0.008 | 4 | 2.58–4.72  | 2x  |   |
| D50   | Mostar Vukodol              | <i>D. sylvestris</i><br>subsp. <i>tergestinus</i> | Bosnia and<br>Herzegovina | 250  | 43.32542 | 17.79292 | I. Rešetnik, S. Bogdanović,<br>I. Ljubičić | 19/06/2018 | ZA-47461 | 0.353 | 0.005 | 5 | 3.32–4.18  | 2x  |   |
| D53   | Mostar Hum                  | <i>D. sylvestris</i><br>subsp. <i>tergestinus</i> | Bosnia and<br>Herzegovina | 385  | 43.32755 | 17.80407 | I. Rešetnik, S. Bogdanović,<br>I. Ljubičić | 19/06/2018 | ZA-47464 | 0.355 | 0.009 | 5 | 2.11–4.87  | 2x  |   |
| D62   | Livno                       | <i>D. sylvestris</i><br>subsp. <i>tergestinus</i> | Bosnia and<br>Herzegovina | 821  | 43.84762 | 16.9733  | I. Rešetnik, S. Bogdanović,<br>I. Ljubičić | 21/06/2018 | ZA-47473 | 0.340 | 0.008 | 3 | 2.81–4.33  | 2x  | + |
| D7    | Mravinica Doli              | <i>D. sylvestris</i><br>subsp. <i>tergestinus</i> | Croatia                   | 351  | 42.81084 | 17.83079 | I. Rešetnik, S. Bogdanović                 | 13/05/2018 | ZA-46282 | 0.351 | 0.007 | 3 | 2.49–4.33  | 2x  | + |
| D9    | Malacka                     | <i>D. sylvestris</i><br>subsp. <i>tergestinus</i> | Croatia                   | 602  | 43.58147 | 16.32579 | I. Rešetnik, S. Bogdanović                 | 13/05/2018 | ZA-46284 | 0.339 | 0.003 | 3 | 4.57–5.88  | 2x  | + |
| 16866 | Ahrntal                     | <i>D. sylvestris</i> s.l. -<br>Alps               | Italy                     | 1075 | 46.89278 | 11.96194 | D. Volgger, F. Faltner, B.<br>Frajman      | 12/07/2021 | IB-16866 | 0.366 | 0.001 | 3 | 5.99–8.21  | 2x  |   |
| 16867 | Pustertal<br>Niederdorf     | <i>D. sylvestris</i> s.l. -<br>Alps               | Italy                     | 1850 | 46.70778 | 12.17528 | D. Volgger, A. Seyer, B.<br>Frajman        | 12/07/2021 | IB-16867 | 0.352 | 0.010 | 3 | 2.71–3.08  | 2x  |   |
| 16868 | Karnische Alpen             | <i>D. sylvestris</i> s.l. -<br>Alps               | Austria                   | 1960 | 46.69444 | 12.49306 | D. Volgger, B. Frajman                     | 13/07/2021 | IB-16868 | 0.326 | 0.005 | 3 | 4.30–5.60  | 2x  |   |
| 16869 | Dolomiti Passo<br>Tre Croci | <i>D. sylvestris</i> s.l. -<br>Alps               | Italy                     | 1810 | 46.5575  | 12.19944 | D. Volgger, B. Frajman                     | 13/07/2021 | IB-16869 | 0.330 | 0.004 | 3 | 4.89–9.03  | 2x  |   |
| 16870 | Dolomiti Fiammes            | <i>D. sylvestris</i> s.l. -<br>Alps               | Italy                     | 1410 | 46.59667 | 12.11222 | D. Volgger, B. Frajman                     | 13/07/2021 | IB-16870 | 0.334 | 0.001 | 3 | 4.80–8.79  | 2x  |   |
| 16871 | Dolomiti<br>Furkelpass      | <i>D. sylvestris</i> s.l. -<br>Alps               | Italy                     | 2140 | 46.71139 | 11.97028 | B. Frajman                                 | 13/07/2021 | IB-16871 | 0.354 | 0.003 | 3 | 6.76–7.30  | 2x  |   |
| 16872 | Pustertal Issing            | <i>D. sylvestris</i> s.l. -<br>Alps               | Italy                     | 870  | 46.81    | 11.84306 | D. Volgger, B. Frajman                     | 13/07/2021 | IB-16872 | 0.359 | 0.004 | 3 | 6.80–9.45  | 2x  |   |
| 16875 | Pustertal<br>Burgkofl       | <i>D. sylvestris</i> s.l. -<br>Alps               | Italy                     | 935  | 46.79278 | 11.88111 | F. Faltner                                 | 12/07/2021 | IB-16875 | 0.348 | 0.008 | 3 | 8.83–10.19 | 2x  |   |
| 16927 | Villgrater Berge            | <i>D. sylvestris</i> s.l. -<br>Alps               | Austria                   | 1500 | 46.80917 | 12.33083 | B. Frajman, M. Doboš                       | 02/08/2021 | IB-16927 | 0.339 | 0.001 | 5 | 2.34–5.62  | 2x  |   |
| 16972 | Pordenone                   | <i>D. sylvestris</i> s.l. -<br>Alps               | Italy                     | 900  | 46.28    | 12.36778 | P. Schönschwetter, T. Zeni                 | 31/07/2021 | IB-16972 | 0.346 | 0.006 | 5 | 3.81–5.44  | 2x  |   |
| 16973 | Prealpi Bellunesi           | <i>D. sylvestris</i> s.l. -<br>Alps               | Italy                     | 1515 | 46.11278 | 12.50778 | P. Schönschwetter, T. Zeni                 | 01/08/2021 | IB-16973 | 0.328 | 0.001 | 3 | 6.65–9.27  | 2x  |   |
| 16977 | Dolomiti<br>Strudelkopf     | <i>D. sylvestris</i> s.l. -<br>Alps               | Italy                     | 2170 | 46.64417 | 12.2     | A. Seyr                                    | 13/08/2021 | IB-16977 | 0.335 | 0.005 | 6 | 3.82–4.90  | 2x  |   |
| D121  | Oberes Gericht              | <i>D. sylvestris</i> s.l. -<br>Alps               | Austria                   | 1160 | 47.03669 | 10.64664 | M. Falch                                   | 16/07/2018 | ZA-54924 | 0.351 | 0.003 | 3 | 2.47–3.43  | 2x  |   |
| D122  | Innsbruck S                 | <i>D. sylvestris</i> s.l. -<br>Alps               | Austria                   | 880  | 47.24425 | 11.41853 | M. Falch                                   | 03/09/2018 | ZA-54925 | 0.360 | 0.004 | 3 | 1.87–4.49  | 2x  |   |
| D164  | Vrsic                       | <i>D. sylvestris</i> s.l. -<br>Alps               | Slovenia                  | 1954 | 46.43132 | 13.73659 | A. Terlević, I. Ljubičić                   | 09/07/2019 | ZA-54970 | 0.333 | 0.000 | 6 | 2.24–2.87  | 2x  |   |
| D197  | Achberg                     | <i>D. sylvestris</i> s.l. -<br>Alps               | Austria                   | 785  | 47.28972 | 10.98667 | B. Frajman                                 | 07/07/2020 | ZA-56826 | 0.359 | 0.004 | 5 | 2.49–6.76  | 2x  |   |

|                  |                         |                                    |                 |      |          |          |                                                      |            |                     |       |       |   |           |    |   |
|------------------|-------------------------|------------------------------------|-----------------|------|----------|----------|------------------------------------------------------|------------|---------------------|-------|-------|---|-----------|----|---|
| D199             | Gailtal Arnoldstein     | <i>D. sylvestris</i> s.l. - Alps   | Austria         | 545  | 46.56528 | 13.69083 | B. Frajman, P. Schönschwetter                        | 22/05/2020 | ZA-56828            | 0.333 | 0.002 | 5 | 2.62–6.11 | 2x |   |
| D67              | Prutz                   | <i>D. sylvestris</i> s.l. - Alps   | Austria         | 904  | 47.07507 | 10.65361 | I. Rešetnik                                          | 27/06/2018 | ZA-47478            | 0.363 | 0.008 | 3 | 1.94–4.48 | 2x |   |
| D68              | Mals                    | <i>D. sylvestris</i> s.l. - Alps   | Italy           | 1039 | 46.67989 | 10.55889 | I. Rešetnik                                          | 27/06/2018 | ZA-47479            | 0.361 | 0.002 | 3 | 2.04–3.96 | 2x |   |
| D69              | Gailtal alps            | <i>D. sylvestris</i> s.l. - Alps   | Austria         | 1971 | 46.75922 | 12.88028 | I. Rešetnik                                          | 29/06/2018 | ZA-47480            | 0.335 | 0.005 | 5 | 1.93–2.89 | 2x |   |
| D70              | Zentralalpen            | <i>D. sylvestris</i> s.l. - Alps   | Austria         | 2030 | 47.01306 | 12.25111 | I. Rešetnik                                          | 30/06/2018 | ZA-47481            | 0.333 | 0.004 | 3 | 2.48–2.90 | 2x |   |
| D71              | Innsbruck Nordkette     | <i>D. sylvestris</i> s.l. - Alps   | Austria         | 1906 | 47.30494 | 11.35861 | I. Rešetnik                                          | 08/07/2018 | ZA-47482            | 0.358 | 0.005 | 3 | 2.51–4.57 | 2x |   |
| Lago di Fedaia   | Lago di Fedaia          | <i>D. sylvestris</i> s.l. - Alps   | Italy           | 2220 | 46.46606 | 11.85929 | H. Luqman                                            | 04/08/2016 | ZT-Lago di Fedaia   | 0.359 | 0.000 | 3 | 6.69–9.79 | 2x |   |
| Mt Caslano       | Mt Caslano              | <i>D. sylvestris</i> s.l. - Alps   | Switzerland     | 332  | 45.96053 | 8.88331  | H. Luqman                                            | 26/06/2017 | ZT-Mt Caslano       | 0.355 | 0.005 | 3 | 6.86–7.55 | 2x |   |
| Mustair Low      | Mustair Low             | <i>D. sylvestris</i> s.l. - Alps   | Switzerland     | 1300 | 46.63216 | 10.44699 | H. Luqman                                            | 03/08/2017 | ZT-Mustair Low      | 0.366 | 0.003 | 3 | 4.89–5.81 | 2x |   |
| Rifugio Graziani | Rifugio Graziani        | <i>D. sylvestris</i> s.l. - Alps   | Italy           | 1566 | 45.79879 | 10.89384 | H. Luqman                                            | 15/07/2017 | ZT-Rifugio Graziani | 0.353 | 0.005 | 3 | 3.81–4.64 | 2x |   |
| Schwarzenmatt    | Schwarzenmatt           | <i>D. sylvestris</i> s.l. - Alps   | Switzerland     | 1220 | 46.63409 | 7.349496 | H. Luqman                                            | 23/07/2016 | ZT-Schwarzenmatt    | 0.369 | 0.004 | 3 | 5.28–7.11 | 2x |   |
| Thumel           | Thumel                  | <i>D. sylvestris</i> s.l. - Alps   | Italy           | 1940 | 45.53495 | 7.10119  | H. Luqman                                            | 26/08/2017 | ZT-Thumel           | 0.367 | 0.008 | 3 | 3.98–4.75 | 2x |   |
| D102             | Obzovica                | <i>D. sylvestris</i> s.l. - Balkan | Montenegro      | 931  | 42.30581 | 18.93189 | S. Bogdanović, I. Ljubičić                           | 16/07/2018 | ZA-48619            | 0.335 | 0.001 | 4 | 2.82–4.14 | 2x | + |
| D103             | Mt Lovcen               | <i>D. sylvestris</i> s.l. - Balkan | Montenegro      | 1681 | 42.4003  | 18.83807 | S. Bogdanović, I. Ljubičić                           | 16/07/2018 | ZA-48620            | 0.337 | 0.007 | 4 | 3.95–4.88 | 2x | + |
| D108             | Gramsh                  | <i>D. sylvestris</i> s.l. - Balkan | Albania         | 969  | 40.86694 | 20.38444 | B. Frajman, P. Schönschwetter                        | 12/07/2018 | ZA-48625            | 0.336 | 0.002 | 4 | 4.19–5.26 | 2x |   |
| D109             | Maja e Ostrovice        | <i>D. sylvestris</i> s.l. - Balkan | Albania         | 1406 | 40.57972 | 20.47722 | B. Frajman, P. Schönschwetter                        | 13/07/2018 | ZA-48626            | 0.336 | 0.007 | 3 | 2.92–4.93 | 2x |   |
| D110             | Mt Jablanica            | <i>D. sylvestris</i> s.l. - Balkan | North Macedonia | 1759 | 41.27278 | 20.535   | B. Frajman, P. Schönschwetter                        | 15/07/2018 | ZA-48627            | 0.342 | 0.003 | 3 | 2.94–4.92 | 2x |   |
| D119             | Mt Valamara             | <i>D. sylvestris</i> s.l. - Balkan | Albania         | 1670 | 40.82167 | 20.50167 | M. Duchon                                            | 16/07/2018 | ZA-54922            | 0.351 | 0.008 | 3 | 1.70–4.23 | 2x |   |
| D145             | Mat                     | <i>D. sylvestris</i> s.l. - Balkan | Albania         | 145  | 41.67954 | 19.84739 | S. Bogdanović, I. Ljubičić, I. Rešetnik, A. Terlević | 26/06/2019 | ZA-54947            | 0.338 | 0.007 | 5 | 3.73–4.76 | 2x | + |
| D147             | Shkoder                 | <i>D. sylvestris</i> s.l. - Balkan | Albania         | 129  | 42.07219 | 19.56423 | S. Bogdanović, I. Ljubičić, I. Rešetnik, A. Terlević | 27/06/2019 | ZA-54953            | 0.330 | 0.002 | 8 | 3.16–4.50 | 2x | + |
| D170             | Mt Kopaonik             | <i>D. sylvestris</i> s.l. - Balkan | Serbia          | 1787 | 43.26151 | 20.83653 | S. Bogdanović, M. Doboš, M. Grgurev, I. Rešetnik     | 10/07/2019 | ZA-54977            | 0.334 | 0.001 | 6 | 2.14–2.48 | 2x | + |
| D171             | Ljuboten peak           | <i>D. sylvestris</i> s.l. - Balkan | North Macedonia | 2255 | 42.19948 | 21.12385 | S. Bogdanović, M. Doboš, M. Grgurev, I. Rešetnik     | 11/07/2019 | ZA-54978            | 0.335 | 0.005 | 5 | 1.83–4.03 | 2x | + |
| D172             | Ljuboten peak scardicus | <i>D. sylvestris</i> s.l. - Balkan | North Macedonia | 2255 | 42.19948 | 21.12385 | S. Bogdanović, M. Doboš, M. Grgurev, I. Rešetnik     | 11/07/2019 | ZA-54979            | 0.336 | 0.004 | 5 | 2.31–4.65 | 2x | + |
| D173             | Mt Bistra               | <i>D. sylvestris</i> s.l. - Balkan | North Macedonia | 1687 | 41.6293  | 20.68481 | S. Bogdanović, M. Doboš, M. Grgurev, I. Rešetnik     | 12/07/2019 | ZA-54980            | 0.336 | 0.001 | 6 | 1.86–2.17 | 2x | + |
| D174             | Mt Galicica             | <i>D. sylvestris</i> s.l. - Balkan | North Macedonia | 1510 | 40.96566 | 20.81879 | S. Bogdanović, M. Doboš, M. Grgurev, I. Rešetnik     | 12/07/2019 | ZA-54981            | 0.339 | 0.000 | 5 | 2.37–4.61 | 2x | + |
| D175             | Mt Korab Nistrovski     | <i>D. sylvestris</i> s.l. - Balkan | North Macedonia | 2112 | 41.7919  | 20.59291 | S. Bogdanović, M. Doboš, M. Grgurev, I. Rešetnik     | 13/07/2019 | ZA-54982            | 0.337 | 0.004 | 5 | 2.98–4.02 | 2x | + |
| D176             | Mt Korab Radika         | <i>D. sylvestris</i> s.l. - Balkan | North Macedonia | 1379 | 41.79959 | 20.62801 | S. Bogdanović, M. Doboš, M. Grgurev, I. Rešetnik     | 13/07/2019 | ZA-54983            | 0.337 | 0.001 | 5 | 2.39–2.41 | 2x | + |

|      |                               |                                       |                    |      |          |          |                                                       |            |                       |       |       |   |           |    |   |
|------|-------------------------------|---------------------------------------|--------------------|------|----------|----------|-------------------------------------------------------|------------|-----------------------|-------|-------|---|-----------|----|---|
| D179 | Mt Jakupica<br>Solunska glava | <i>D. sylvestris</i> s.l. -<br>Balkan | North<br>Macedonia | 2274 | 41.69279 | 21.40381 | S. Bogdanović, M. Grgurev,<br>I. Rešetnik             | 17/07/2019 | ZA-54986              | 0.347 | 0.005 | 5 | 2.02–3.73 | 2x | + |
| D180 | Mt Jakupica<br>Ismailica      | <i>D. sylvestris</i> s.l. -<br>Balkan | North<br>Macedonia | 1235 | 41.68044 | 21.43242 | S. Bogdanović, M. Grgurev,<br>I. Rešetnik             | 17/07/2019 | ZA-54987              | 0.345 | 0.006 | 5 | 1.75–2.61 | 2x | + |
| D182 | Gjergjevica                   | <i>D. sylvestris</i> s.l. -<br>Balkan | Albania            | 1300 | 40.58626 | 20.57514 | L. Shuka                                              | 27/07/2019 | ZA-54989,<br>ZA-54990 | 0.376 | 0.004 | 4 | 4.73–6.00 | 2x | + |
| D204 | Voskopoje                     | <i>D. sylvestris</i> s.l. -<br>Balkan | Albania            | 1165 | 40.58247 | 20.56072 | D. Lakušić, N. Kuzmanović,<br>I. Janković, M. Zbiljić | 11/07/2018 | ZA-58876              | 0.355 | 0.004 | 3 | 5.63–8.89 | 2x |   |
| D246 | Sar Planina                   | <i>D. sylvestris</i> s.l. -<br>Balkan | Albania            | 2119 | 42.09306 | 20.8931  | I. Rešetnik, M. Doboš, I.<br>Ljubičić                 | 21/07/2021 | ZA-62636              | 0.338 | 0.006 | 3 | 3.26–4.52 | 2x |   |
| D248 | Mali Gropa                    | <i>D. sylvestris</i> s.l. -<br>Balkan | Albania            | 1616 | 41.37702 | 20.06664 | I. Rešetnik, M. Doboš, I.<br>Ljubičić                 | 22/07/2021 | ZA-62637              | 0.348 | 0.003 | 4 | 3.85–5.21 | 2x |   |
| D76  | Maljen                        | <i>D. sylvestris</i> s.l. -<br>Balkan | Serbia             | 640  | 44.04424 | 20.01645 | S. Đurović, G. Tomović                                | 15/07/2018 | ZA-48631              | 0.328 | 0.006 | 4 | 2.95–4.37 | 2x |   |
| D77  | Mt Sar Planina                | <i>D. sylvestris</i> s.l. -<br>Balkan | Serbia             | 1755 | 42.2335  | 20.91537 | D. Lakušić, N. Kuzmanović,<br>I. Janković, M. Zbiljić | 14/07/2018 | ZA-48632              | 0.340 | 0.004 | 3 | 2.23–4.34 | 2x |   |
| D79  | Mt Kopaonik<br>Pancicev vrh   | <i>D. sylvestris</i> s.l. -<br>Balkan | Serbia             | 1660 | 43.26149 | 20.83973 | S. Đurović, G. Tomović                                | 13/07/2018 | ZA-48634              | 0.335 | 0.004 | 3 | 3.69–3.95 | 2x |   |

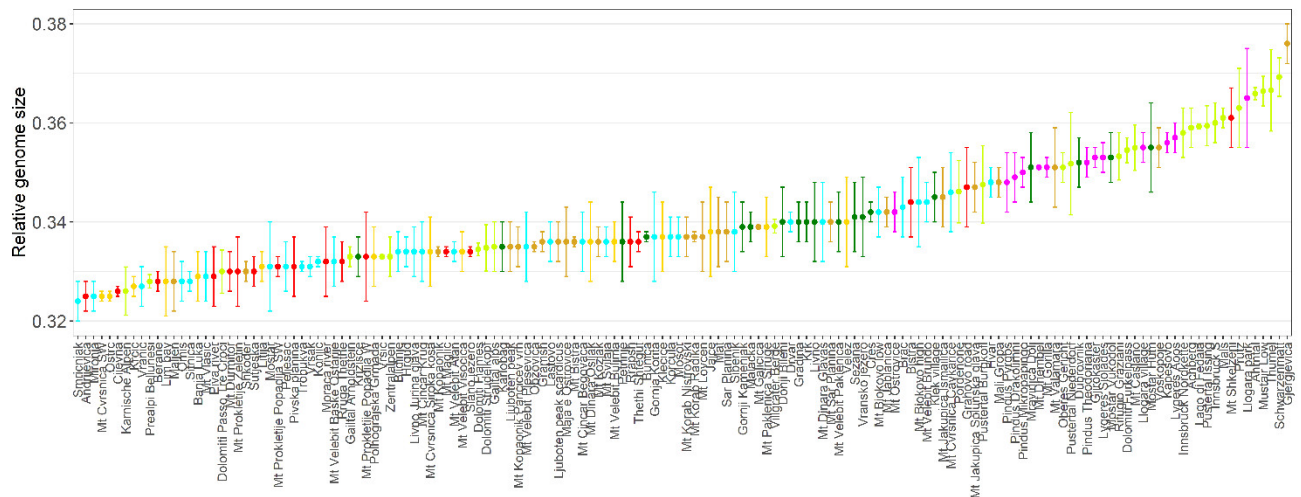

**Figure S1.** Relative genome size (RGS) in diploid populations of *Dianthus sylvestris* sorted by increasing RGS values. Population means (dots) with corresponding standard deviation (vertical lines) are presented. Population names correspond to Table S1. Colors correspond to subspecies, as in Figure 2.

**Table S2.** Results of Kruskal Wallis test between diploid (2x, N = 9) and tetraploid (4x, N = 7) populations of *Dianthus sylvestris* subsp. *sylvestris*. Morphological characters with significant differences between ploidy levels at  $p < 0.05$  are shown in bold.

| Character                                               | Abbreviation | statistic | <i>p</i> value  |
|---------------------------------------------------------|--------------|-----------|-----------------|
| Length of the woody part of the stem below basal leaves | BL           | 0.025779  | 0.872442        |
| Basal leaf length                                       | BLL          | 4.495013  | <b>0.033994</b> |
| Calyx length                                            | CL           | 0.02521   | 0.873845        |
| Length of the cauline leaf from the second stem node    | CLL          | 6.463286  | <b>0.011013</b> |
| Calyx teeth length                                      | CTL          | 1.235294  | 0.26638         |
| Number of epicalyx scales                               | ESN          | 1.153723  | 0.282771        |
| Height of first branching                               | FBH          | 7.868347  | <b>0.005031</b> |
| Number of flowers per stem                              | FPS          | 2.072495  | 0.149976        |
| Inflorescence length                                    | IL           | 2.876809  | 0.089864        |
| Inner epicalyx scale apex length                        | ISAL         | 0.809524  | 0.368261        |
| Inner epicalyx scale length                             | ISL          | 1.235294  | 0.26638         |
| Inner epicalyx scale width                              | ISW          | 2.691877  | 0.100861        |
| Length of the first stem internode                      | LIL          | 0.002818  | 0.957667        |
| Plant height                                            | PH           | 5.9359    | <b>0.014835</b> |
| Petal length                                            | PL           | 0.226891  | 0.633839        |
| Petal limb length                                       | PLL          | 0.02521   | 0.873845        |
| Petal limb width                                        | PLW          | 0.02521   | 0.873845        |
| Petal teeth length                                      | PTL          | 0.630252  | 0.427263        |
| Maximum number of petal teeth                           | PTMAX        | 0.912933  | 0.339337        |
| Minimum number of petal teeth                           | PTMIN        | 2.707805  | 0.099858        |
| Ratio Calyx teeth length / Calyx length                 | RCALYX       | 2.699817  | 0.10036         |
| Ratio Petal teeth length / Petal limb length            | RDENT        | 0.280938  | 0.596087        |



|                                                                             |        |          |                |
|-----------------------------------------------------------------------------|--------|----------|----------------|
| Ratio Calyx length / Claw length                                            | RFL    | 1.011204 | 0.314614       |
| Ratio Inner epicalyx scale length without apex / Inner epicalyx scale width | RIS    | 1.481793 | 0.223494       |
| Ratio Inner epicalyx scale apex length / Inner epicalyx scale length        | RISA   | 0.070028 | 0.791296       |
| Ratio Petal limb length / Petal limb width                                  | RLIMB  | 1.122098 | 0.289467       |
| Ratio Petal limb length / Petal length                                      | RPETAL | 0.718143 | 0.396754       |
| Length of the last stem internode below branching                           | UIL    | 4.715618 | <b>0.02989</b> |

**Table S3.** Results of Kruskal Wallis test between diploid (2x, N = 15) and tetraploid (4x, N = 10) populations of *Dianthus sylvestris* subsp. *sylvestris*. Environmental variables with significant differences between ploidy levels at  $p < 0.05$  are shown in bold.

| short name    | long name                                                | unit                   | statistic | p value         |
|---------------|----------------------------------------------------------|------------------------|-----------|-----------------|
| bio01         | mean annual air temperature                              | °C/10                  | 5.060548  | <b>0.024477</b> |
| bio02         | mean diurnal air temperature range                       | °C/10                  | 4.601475  | <b>0.031944</b> |
| bio03         | isothermality                                            | °C/10                  | 5.829034  | <b>0.015764</b> |
| bio04         | temperature seasonality                                  | °C/10                  | 0.249231  | 0.617617        |
| bio05         | mean daily maximum air temperature of the warmest month  | °C/10                  | 0.943033  | 0.331499        |
| bio06         | mean daily minimum air temperature of the coldest month  | °C/10                  | 9.484988  | <b>0.002072</b> |
| bio07         | annual range of air temperature                          | °C/10                  | 3.673611  | 0.05528         |
| bio08         | mean daily mean air temperatures of the wettest quarter  | °C/10                  | 1.492675  | 0.221802        |
| bio09         | mean daily mean air temperatures of the driest quarter   | °C/10                  | 0.249327  | 0.61755         |
| bio10         | mean daily mean air temperatures of the warmest quarter  | °C/10                  | 4.681801  | <b>0.030484</b> |
| bio11         | mean daily mean air temperatures of the coldest quarter  | °C/10                  | 6.533385  | <b>0.010587</b> |
| bio12         | annual precipitation amount                              | kg m <sup>-2</sup>     | 0.062332  | 0.802848        |
| bio13         | precipitation amount of the wettest month                | kg m <sup>-2</sup>     | 0.197151  | 0.657031        |
| bio14         | precipitation amount of the driest month                 | kg m <sup>-2</sup>     | 5.198299  | <b>0.022609</b> |
| bio15         | precipitation seasonality                                | kg m <sup>-2</sup>     | 2.972931  | 0.084668        |
| bio16         | mean monthly precipitation amount of the wettest quarter | kg m <sup>-2</sup>     | 0.249231  | 0.617617        |
| bio17         | mean monthly precipitation amount of the driest quarter  | kg m <sup>-2</sup>     | 4.102386  | <b>0.042823</b> |
| bio18         | mean monthly precipitation amount of the warmest quarter | kg m <sup>-2</sup>     | 0.603309  | 0.437318        |
| bio19         | mean monthly precipitation amount of the coldest quarter | kg m <sup>-2</sup>     | 0.012308  | 0.911664        |
| dtm_east      | eastness                                                 | index                  | 8.972308  | <b>0.002741</b> |
| dtm_north     | northness                                                | index                  | 0.110769  | 0.73927         |
| dtm_slope     | slope                                                    | °                      | 4.68      | <b>0.030516</b> |
| nfd           | number of frost days                                     | No days                | 9.833654  | <b>0.001713</b> |
| sdays         | number of snow days                                      | No days                | 7.240477  | <b>0.007128</b> |
| soil_clay     | clay content                                             | %                      | 6.484245  | <b>0.010883</b> |
| soil_org_carb | soil organic carbon content                              | x 5 g kg <sup>-1</sup> | 1.563563  | 0.211144        |
| soil_ph_h2o   | soil pH x 10 in H2O                                      | pH                     | 1.238427  | 0.265774        |
| soil_sand     | sand content                                             | %                      | 1.236239  | 0.266197        |
| soil_water    | soil water content at 33kPa                              |                        | 0.625926  | 0.428854        |
| srاد          | surface solar radiation downwards                        | kJ m <sup>-2</sup>     | 4.68      | <b>0.030516</b> |

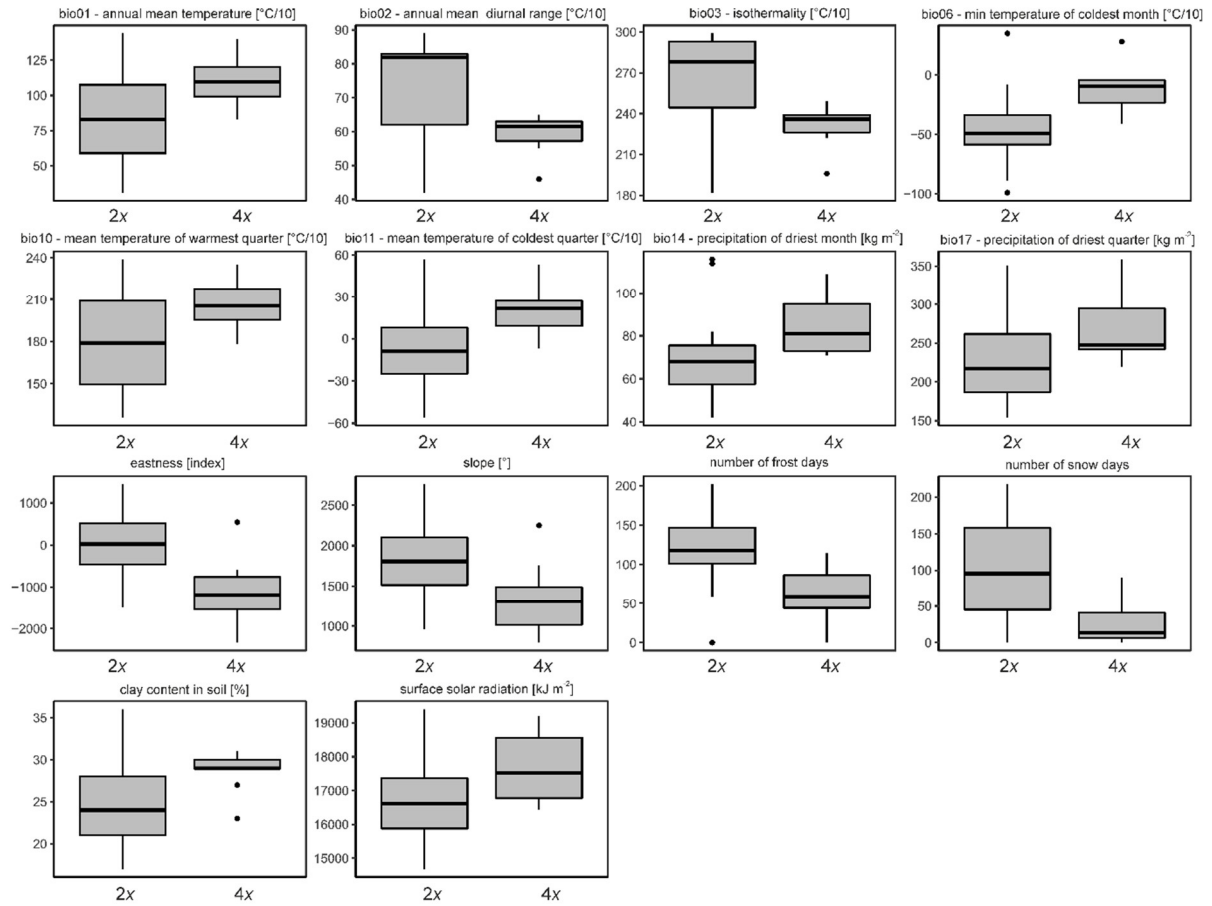

**Figure S2.** Boxplots showing environmental differences along the 14 environmental variables between diploid (2x) and tetraploid (4x) populations of *Dianthus sylvestris* subsp. *sylvestris*. Only variables with significant differences ( $p < 0.05$ ), as revealed by Kruskal Wallis test (Table S3), are shown.
